# Supplementary material for: Optimization and Testing of Hybrid 3D Printing Vitrimer Resins
Source: MDPI journal article supplement (doi:10.3390/polym14235102), 2022-11-24
Supplement: s1 [file s1]

## SUPPORTING INFORMATION

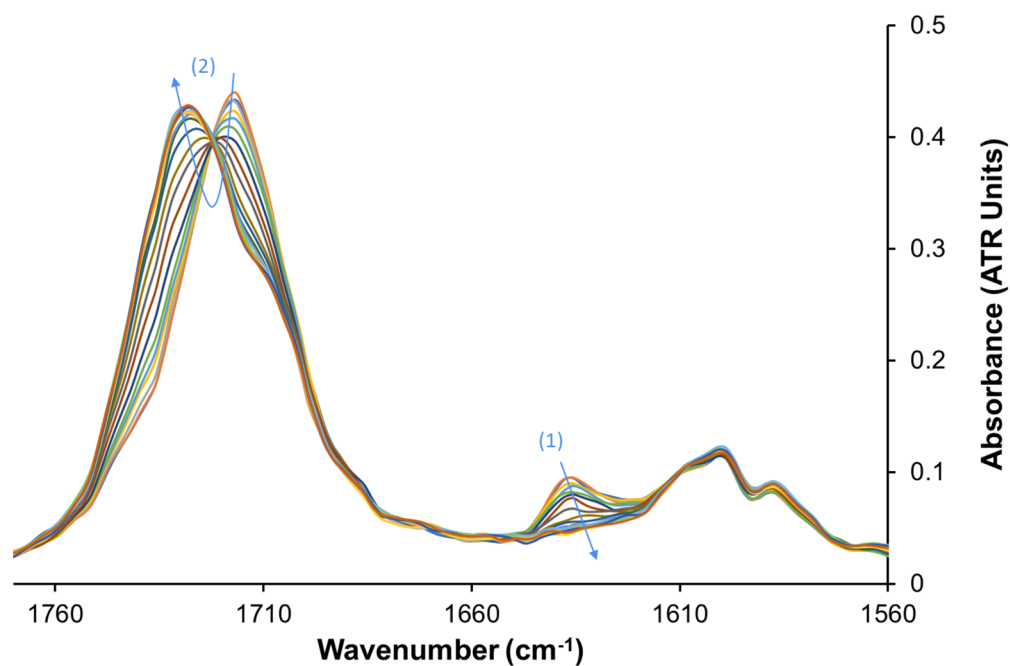

**Figure S1.** FTIR absorbance spectra of acrylate/methacrylate C=C bonds (1) and carbonyls (2) during UV cure at ambient temperature. Elapsed time between initial and final spectra: 40 s

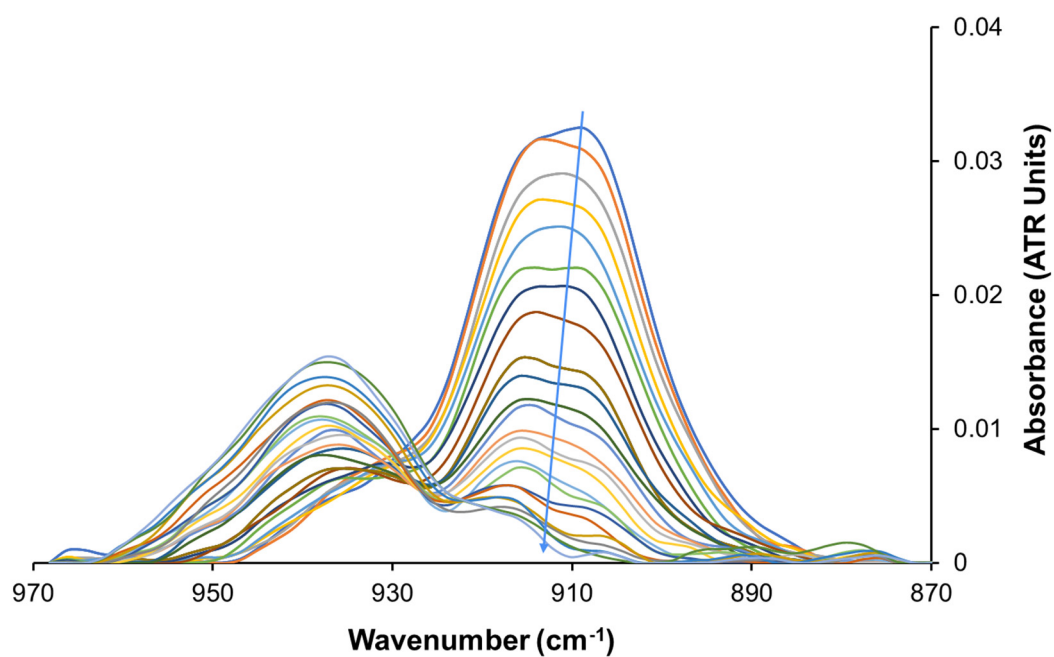

**Figure S2.** FTIR absorbance spectra of epoxy bonds during epoxy-acid reaction at 120°C. The absorbance peak disappears in a little over 2 h.

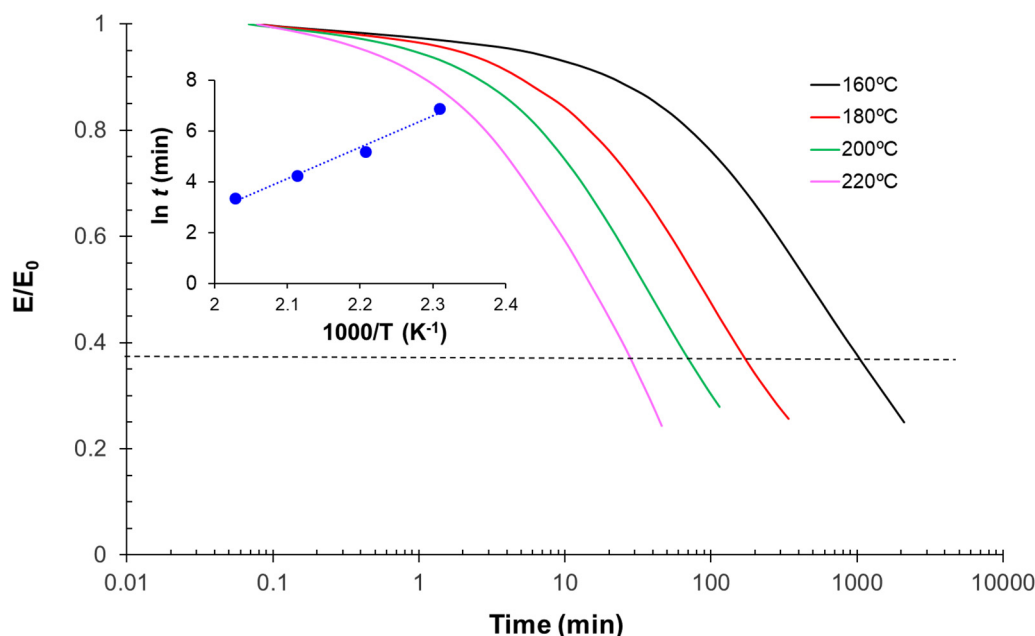

**Figure S3.** Normalized relaxation modulus of FEMA 3D 25 at different temperatures. The dashed line marks  $E/E_0=1/e$ , which corresponds to the characteristic relaxation time  $\tau^*$ . Inset: Arrhenius plot used to compute the activation energy of relaxation  $E_a$

In vitrimers and vitrimer-like materials, characteristic relaxation times  $\tau^*$  (i.e. time required to relax ~63% of the stress) exhibit Arrhenius-like behavior represented mathematically by  $\tau(T) = \tau_0 \cdot \exp(E_{act}/RT)$ , and plotted as in Figure S3 (inset) for FEMA 3D 25. The topology freezing temperature  $T_v$ , below which the transesterification reactions are assumed negligibly slow, was determined following the procedure by Capelot et al (ACS Macro Lett. 1, 2012, pp. 789-792). It is assumed that liquid-to-solid transition occurs (i.e. the topology freezes) once the viscosity exceeds  $10^{12}$  Pa.s. Using the Maxwell equation  $\eta = G \cdot \tau^*$ , the characteristic time that corresponds to this viscosity can be calculated. The shear modulus and tensile modulus are related through the equation  $G = E' / [2(1 + \nu)]$  where  $\nu$  is the Poisson's ratio (assumed equal to 0.5 in the rubbery state). Using  $E'$  determined by DMA,  $T_v$  can be calculated in a straightforward manner.

**Table S1.** Kinetic parameters of stress relaxation of FEMA 3D 25. Also shown is the value of  $E'$  used in the calculations

| $E'$ (MPa) | $E_a$ (kJ/mol) | $\ln(\tau_0)$ (min) | $T_v$ (°C) |
|------------|----------------|---------------------|------------|
| 17         | 103            | 22                  | 157        |

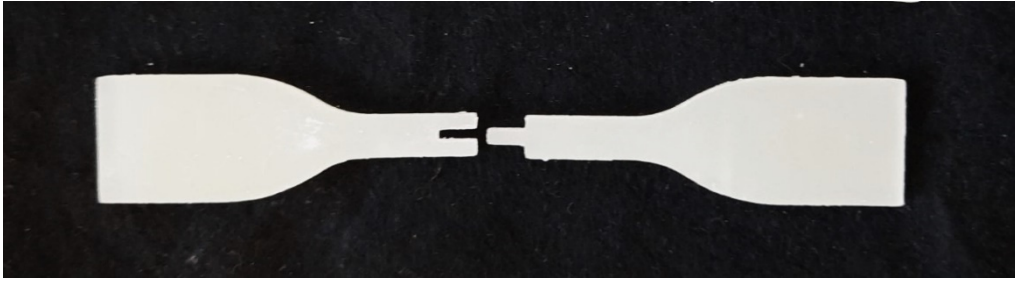

**Figure S4.** Toothed halves printed using FEMA 3D 25 to be assembled and tensile tested.
